# Supplementary material for: Impairment of PGC-1 Alpha Up-Regulation Enhances Nitrosative Stress in the Liver during Acute Pancreatitis in Obese Mice
Source: MDPI journal article supplement (doi:10.3390/antiox9090887), 2020-09-19
Supplement: s1 [file s1]

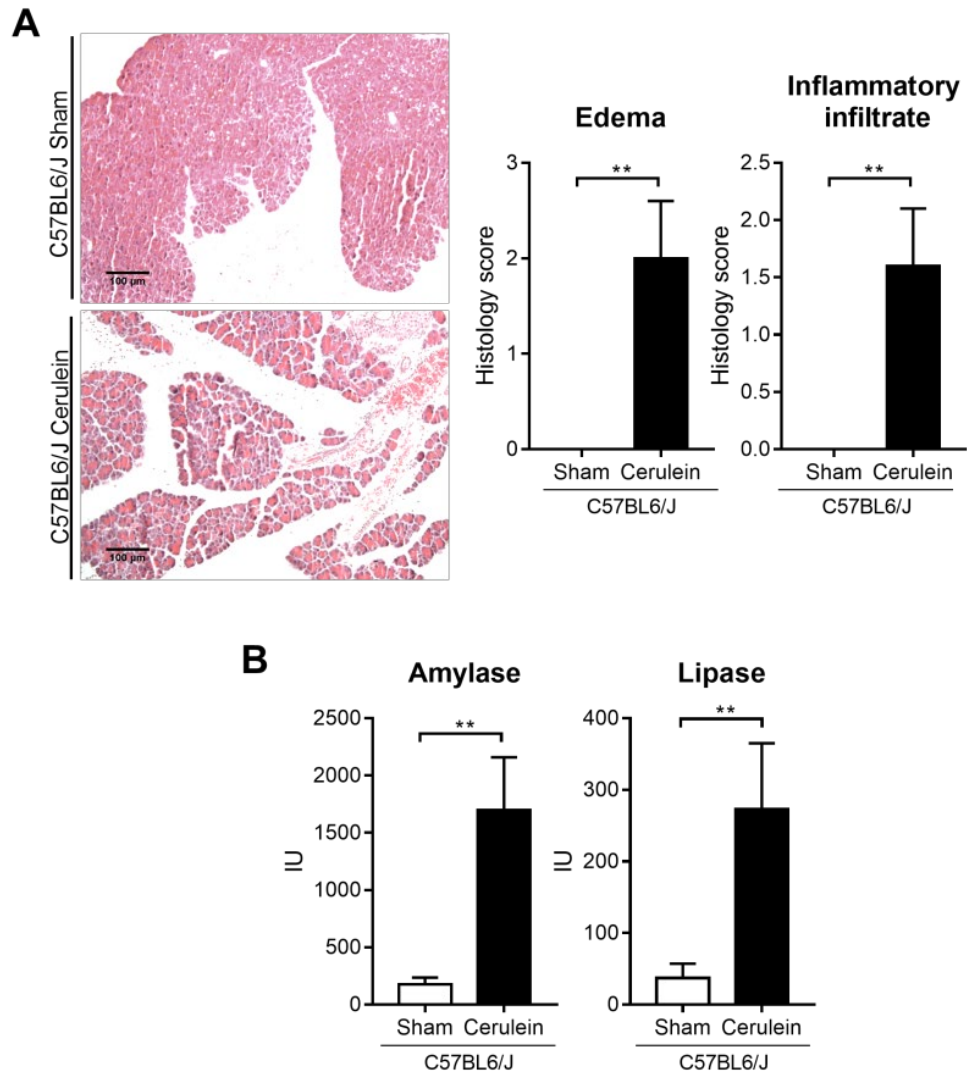

**Figure S1.** (A) Representative histology and histology score for edema and inflammatory infiltrate in the pancreas of the control (Sham) and 1 h after the cerulein-induced acute pancreatitis (Cerulein) mice. (B) Pancreatic amylase and lipase activity in plasma of the control (Sham) and 1 h after the cerulein-induced acute pancreatitis (Cerulein) mice. There were six mice per group. Statistical difference is indicated as \*\*  $p < 0.01$  vs. Sham.

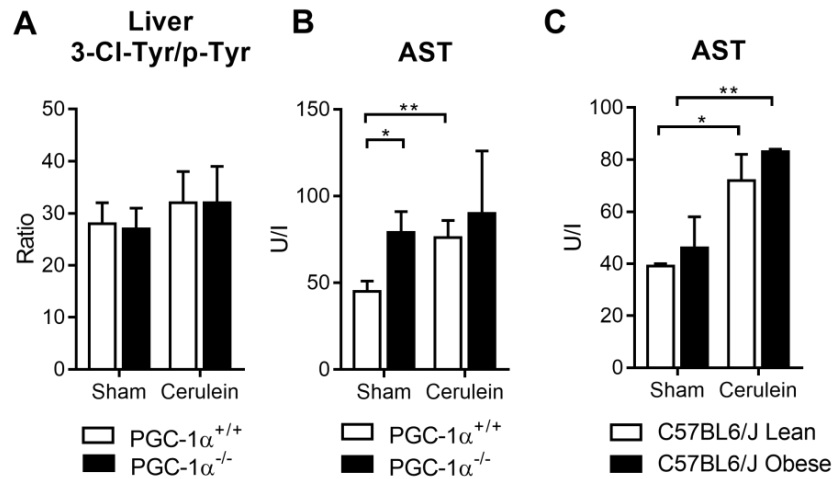

**Figure S2.** (A) Determination of the 3-Chloro-Tyr/p-Tyr ratio in the livers of the sham PGC-1 $\alpha^{+/+}$  (WT) and PGC-1 $\alpha^{-/-}$  (KO) mice and at 1 h after cerulein-induced AP (Cerulein). (B) Aminotransferase (AST) activity in plasma of the sham PGC-1 $\alpha^{+/+}$  (WT) and PGC-1 $\alpha^{-/-}$  (KO) mice and at 1 h after cerulein-induced AP (Cerulein). (C) AST activity in plasma of the sham lean and obese mice and 1 h after cerulein-induced acute pancreatitis (Cerulein). There were between five and six mice per group. The statistical difference is indicated as \*  $p < 0.05$  and \*\*  $p < 0.001$ .
